# Supplementary material
Source: publisher figshare collection journal article supplement (https://frontiersin.figshare.com/ndownloader/files/34013285)
Supplement: Supplementary file [file 34013285]

|                                                             |
|-------------------------------------------------------------|
| <b>C.A.L.A. - Study Phase 1</b><br><b>Case descriptions</b> |
|-------------------------------------------------------------|

**Case description 1:**

---

**== Base Model 1 ==**

- Male, 27 years
- weight: approx. 74 kg
- normal muscular
- slim constitution
- height: 180cm
- upper arm: circumference 20.9 cm, length 25.4 cm
- forearm: circumference 22.3 cm, length 14.8 cm

**== Case 1: ==**

Transhumeral amputation left

Pain

- Upper arm medial: slight
- Forearm circular: moderate
- Hand palmar: extreme

Cramping

- Forearm palmar: slight
- Finger & hand palmar: strong

Modeling the phantom

- Forearm shortened to half length (telescoping)
- Fingers are perceived as very thin

Positioning the phantom

- shoulder joint: slight flexion and abduction, distinct internal rotation
  - elbow: 90° flexion, pronated
  - wrist: palmar flexion
  - finger: fist
-

|                                                             |
|-------------------------------------------------------------|
| <b>C.A.L.A. - Study Phase 1</b><br><b>Case descriptions</b> |
|-------------------------------------------------------------|

**Case description 2:**

---

**== Base Model 2 ==**

- Female, 55 years
- Weight: approx. 95 kg
- clearly overweight
- height: 165 cm
- thigh: circumference 69 cm, length 35.8 cm
- lower leg: circumference 48.4 cm, length 37 cm

**== Case 2: ==**

Transfemoral amputation right

Pain

- Upper leg distal, circular: moderate pain
- Lower leg medial: severe pain
- Ankle circular: mild pain

Cramping

- Foot whole inside: medium

Modeling the phantom

- Lower leg: length felt shortened to approx. 1/3, is felt clearly enlarged
- Foot: is felt enlarged

Positioning the phantom

- Hip joint: normal position
- Knee: rotated outwards (approx. 160°)
- Foot: maximum inversion, slight dorsal extension
- Big toe: maximum hyperextension
